# Supplementary material for: Phthalate Exposure During the Prenatal and Lactational Period Increases the Susceptibility to Rheumatoid Arthritis in Mice
Source: Front Immunol. 2020 Apr 3;11:550. doi: 10.3389/fimmu.2020.00550 (PMC7145968; doi:10.3389/fimmu.2020.00550)
Supplement: Supplementary file 3 [file Table_3.XLSX]

## Sheet: ST 3
Supplementary Table 3. Annotation clustering by DAVID bioinformatics resource.
DAVID Bioinformatics Resources 6.8
Functional Annotation Clustering
Current Gene List:	Diff gene list (n, 45)
Current Background:	Mus musculus
45 DAVID IDs
Annotation Cluster 1
Enrichment Score: 2.52
Category	Term	Count	%	PValue	Genes	List Total	Pop Hits	Pop Total	Fold Enrichment	Bonferroni	Benjamini	FDR
GOTERM_BP_DIRECT	GO:0006270~DNA replication initiation	4	8.88889	1.81958e-05	CDC6, MCM2, MCM5, MCM6	40	24	18082	75.3417	0.00741451	0.00741451	0.0254587
UP_KEYWORDS	DNA replication	5	11.1111	3.4487e-05	CDC6, RRM2, MCM2, MCM5, MCM6	45	95	22680	26.5263	0.00361465	0.00361465	0.0386229
INTERPRO	IPR018525:Mini-chromosome maintenance, conserved site	3	6.66667	6.35392e-05	MCM2, MCM5, MCM6	44	6	20594	234.023	0.00835236	0.00835236	0.0741704
GOTERM_BP_DIRECT	GO:0006260~DNA replication	5	11.1111	0.000139482	CDC6, RRM2, MCM2, MCM5, MCM6	40	123	18082	18.376	0.055455	0.028123	0.195003
UP_SEQ_FEATURE	domain:MCM	3	6.66667	0.000140326	MCM2, MCM5, MCM6	42	8	18012	160.821	0.029313	0.029313	0.177417
INTERPRO	IPR001208:Mini-chromosome maintenance, DNA-dependent ATPase	3	6.66667	0.000151888	MCM2, MCM5, MCM6	44	9	20594	156.015	0.0198511	0.00997528	0.177218
SMART	SM00350:MCM	3	6.66667	0.000166057	MCM2, MCM5, MCM6	24	9	10425	144.792	0.00397777	0.00397777	0.133131
GOTERM_CC_DIRECT	GO:0042555~MCM complex	3	6.66667	0.000166556	MCM2, MCM5, MCM6	44	9	19662	148.955	0.0150435	0.0150435	0.181428
GOTERM_MF_DIRECT	GO:0003678~DNA helicase activity	3	6.66667	0.000844771	MCM2, MCM5, MCM6	43	18	17446	67.6202	0.111586	0.111586	0.992212
KEGG_PATHWAY	mmu03030:DNA replication	3	6.66667	0.00706126	MCM2, MCM5, MCM6	29	35	7691	22.732	0.369101	0.369101	6.9677
KEGG_PATHWAY	mmu04110:Cell cycle	4	8.88889	0.00998701	CDC6, MCM2, MCM5, MCM6	29	124	7691	8.55506	0.479215	0.278346	9.72404
INTERPRO	IPR012340:Nucleic acid-binding, OB-fold	3	6.66667	0.0151841	MCM2, MCM5, MCM6	44	90	20594	15.6015	0.8673	0.489938	16.3615
UP_KEYWORDS	Helicase	3	6.66667	0.0263646	MCM2, MCM5, MCM6	45	130	22680	11.6308	0.939519	0.29579	25.8647
GOTERM_CC_DIRECT	GO:0000784~nuclear chromosome, telomeric region	3	6.66667	0.0314596	MCM2, MCM5, MCM6	44	127	19662	10.5558	0.94546	0.34002	29.424
UP_KEYWORDS	Cell cycle	5	11.1111	0.0326773	CDC6, MCM2, SIK1, MCM5, MCM6	45	626	22680	4.02556	0.969451	0.321318	31.0742
GOTERM_MF_DIRECT	GO:0004386~helicase activity	3	6.66667	0.0385359	MCM2, MCM5, MCM6	43	129	17446	9.43537	0.99592	0.74727	37.1034
GOTERM_BP_DIRECT	GO:0007049~cell cycle	5	11.1111	0.0423926	CDC6, MCM2, SIK1, MCM5, MCM6	40	614	18082	3.68119	1	0.890803	45.4553
UP_SEQ_FEATURE	nucleotide phosphate-binding region:ATP	5	11.1111	0.174421	CDC6, MCM2, SIK1, MCM5, MCM6	42	963	18012	2.22667	1	0.998855	91.1548
INTERPRO	IPR027417:P-loop containing nucleoside triphosphate hydrolase	4	8.88889	0.295015	CDC6, MCM2, MCM5, MCM6	44	909	20594	2.05961	1	0.99999	98.3128
GOTERM_CC_DIRECT	GO:0005654~nucleoplasm	5	11.1111	0.622447	EGR1, CDC6, MCM2, MCM5, MCM6	44	1935	19662	1.15469	1	0.996073	99.9976
